# Supplementary material for: The association of circulating kynurenine, a tryptophan metabolite, with frailty in older adults
Source: publisher site journal article supplement (doi:10.18632/aging.104179), 2020-11-13
Supplement: Supplementary file [file aging-v12i21-104179-supplementary-material-SD1.pdf]

## Supplementary Table

**Supplementary Table 1. Items for comprehensive geriatric assessment-frailty index.**

| <b>Medical History (21 items)</b>     |                                          |                                          |
|---------------------------------------|------------------------------------------|------------------------------------------|
| • Angina                              | • COPD                                   | • Heart failure                          |
| • Anxiety disorder                    | • Coronary artery disease                | • Hypertension                           |
| • Arthritis                           | • Degenerative spine disease             | • Myocardial infarction                  |
| • Asthma                              | • Dementia                               | • Peripheral vascular disease            |
| • Atrial fibrillation/flutter         | • Depression                             | • Sensory impairment                     |
| • Cancer within 5 years               | • Diabetes                               | • Stroke/TIA                             |
| • Chronic kidney disease (eGFR < 60)  | • Fall within the past year              | • Use of ≥ 5 prescription drugs          |
| <b>Functional Status (22 items)</b>   |                                          |                                          |
| <b>Activities of Daily Living</b>     | <b>Activities of Daily Living</b>        | <b>Nagi and Rosow-Breslau Activities</b> |
| • Feeding                             | • Using telephone                        | • Pulling or pushing a large object      |
| • Dressing/undressing                 | • Using transportation                   | • Stooping, crouching or kneeling        |
| • Grooming                            | • Shopping                               | • Lifting or carrying 10 lbs             |
| • Walking (or use of a walker)        | • Preparing own meals                    | • Reaching arms above shoulder           |
| • Getting in and out of bed           | • Housework                              | • Writing or handling small objects      |
| • Toileting                           | • Taking own medications                 | • Walking up/down a flight of stairs     |
| • Bathing or shower                   | • Managing money                         | • Heavy work around house                |
| <b>Performance Tests (4 items)</b>    |                                          |                                          |
| <b>Mini-Mental Status Examination</b> |                                          | <b>5 Repeated Chair Stands</b>           |
| 27–30 points (0 points)               |                                          | <11.20 s (0 points)                      |
| 24–26 points (0.3 points)             |                                          | 11.20–13.69 s (0.25 points)              |
| 21–23 points (0.7 points)             |                                          | 13.70–16.69 s (0.5 points)               |
| <21 points (1 point)                  |                                          | 16.70–60.9 s (0.75 points)               |
|                                       |                                          | ≥ 61.0 s (1 point)                       |
| <b>Gait Speed</b>                     |                                          | <b>Dominant Handgrip Strength</b>        |
| ≥ 1 m/sec (0 points)                  |                                          | M, ≥ 32 kg; F, ≥ 20 kg (0 points)        |
| 0.80–0.99 m/s (0.3 points)            |                                          | M, ≥ 26–31 kg; F, 16–19 kg (0.5 points)  |
| 0.60–0.79 m/sec (0.7 points)          |                                          | M, <26 kg; F, <16 kg (1 point)           |
| <0.60 m/s (1 point)                   |                                          |                                          |
| <b>Nutritional Status (3 items)</b>   |                                          |                                          |
| • Weight loss > 4.5 kg in past year   | • Body mass index < 21 kg/m <sup>2</sup> | • Serum albumin < 3.5 g/dL               |

Abbreviations: COPD, chronic obstructive pulmonary disease; eGFR, estimated glomerular filtration rate; F, female; M, male; TIA, transient ischemic attack.
